# Supplementary material for: Does Microbial Diversity of Cave Ecosystems Differ from Outside? The Case of the Azé Show Cave (France)
Source: Research Square preprint supplement (doi:10.21203/rs.3.rs-471958/v1), 2021-05-05

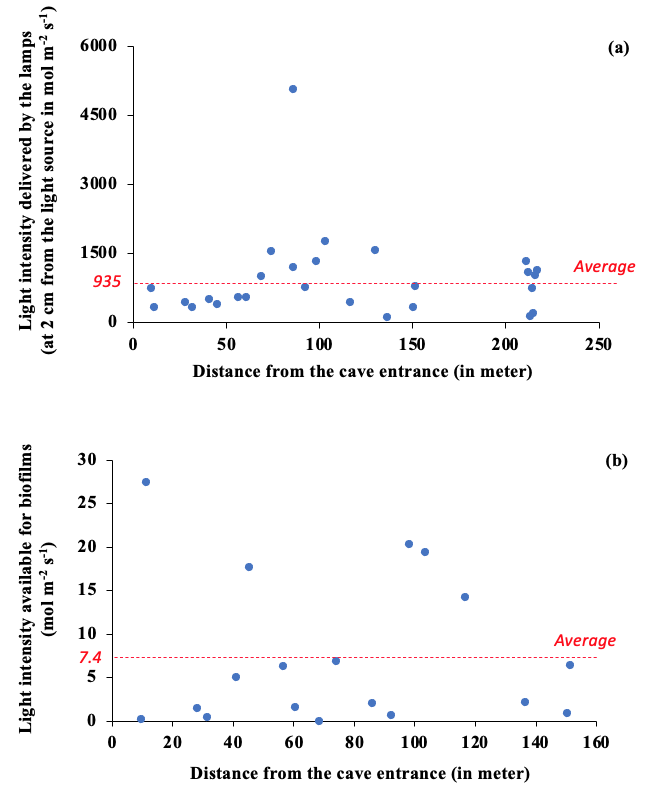
**Sup. 1 Evolution of the light intensity delivered by the artificial light inside the cave and the light available for the biofilms.**


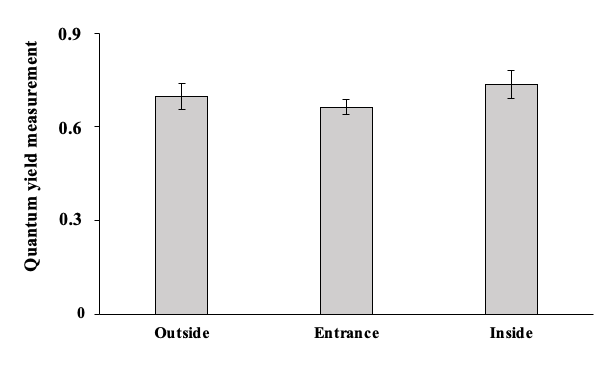


**Sup. 2 Quantum yield measurements of the sampled biofilms outside, at the entrance and inside the Azé cave. The average values of the three area were not statistically significant.**

**Sup. 3 The biofilm colorimetric parameters were measured with a spectrophotometer. Color measurements were analyzed according to the CIELAB color system. The a* scale is associated with changes in redness-greenness (positive a* is red and negative a* is green).**


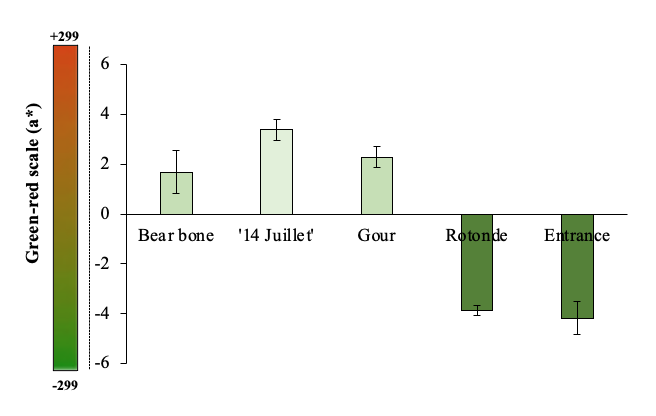

Supplement: Supplementary file 1 [file e4ff885bcc361ac03c24ec8d.docx]
